# Supplementary material for: Disulfiram/Cu Kills and Sensitizes BRAF-Mutant Thyroid Cancer Cells to BRAF Kinase Inhibitor by ROS-Dependently Relieving Feedback Activation of MAPK/ERK and PI3K/AKT Pathways
Source: MDPI journal article supplement (doi:10.3390/ijms24043418), 2023-02-08
Supplement: s1 [file s1]

## Supplementary Materials

**Table S1.** The antibodies used in this study

| Antibodies              | Catalog# | Source                     |
|-------------------------|----------|----------------------------|
| anti- $\beta$ -Actin    | A5441    | Millipore-Sigma            |
| anti-t-ERK              | #4695    | Cell Signalling Technology |
| anti-p-ERK              | #4370    | Cell Signalling Technology |
| anti-t-AKT              | #4691    | Cell Signalling Technology |
| anti-p-AKT Ser473       | #4060    | Cell Signalling Technology |
| anti-p-AKT Thr308       | #13038   | Cell Signalling Technology |
| anti-t-HER3             | #4754    | Cell Signalling Technology |
| anti-p-HER3             | #2842    | Cell Signalling Technology |
| anti-p-AKT Thr308 (IHC) | BS4009   | Bioworld Technology        |
| anti-t-HER3 (IHC)       | 2220243  | ZENBIO                     |

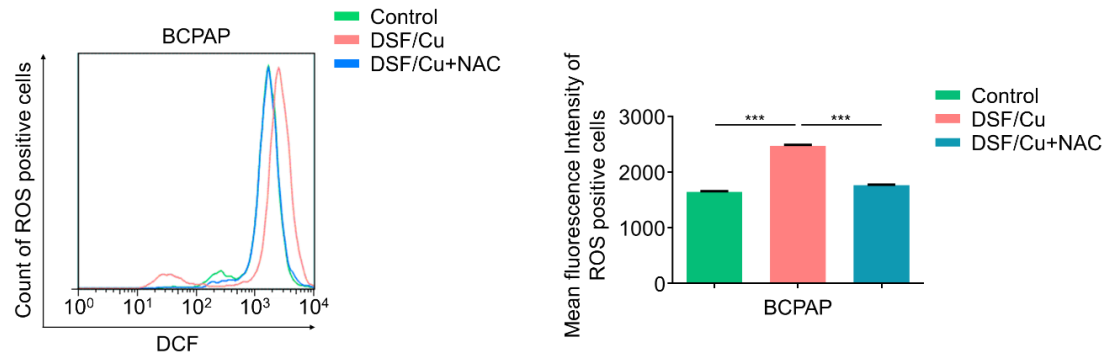

**Figure S1.** BCPAP cells were treated with 0.5  $\mu$ M DSF/Cu alone or in combination with 2 mM NAC for 48 h, followed by a 1.5-h incubation with an ROS-sensitive fluorescent dye DCF-DA. The ROS-positive cells were measured by flow cytometer (left panel), and the mean fluorescence intensity of three independent experiments was then calculated by Student's t test (right panel). Data presented as means  $\pm$  SD. \*\*\*  $P < 0.001$ .

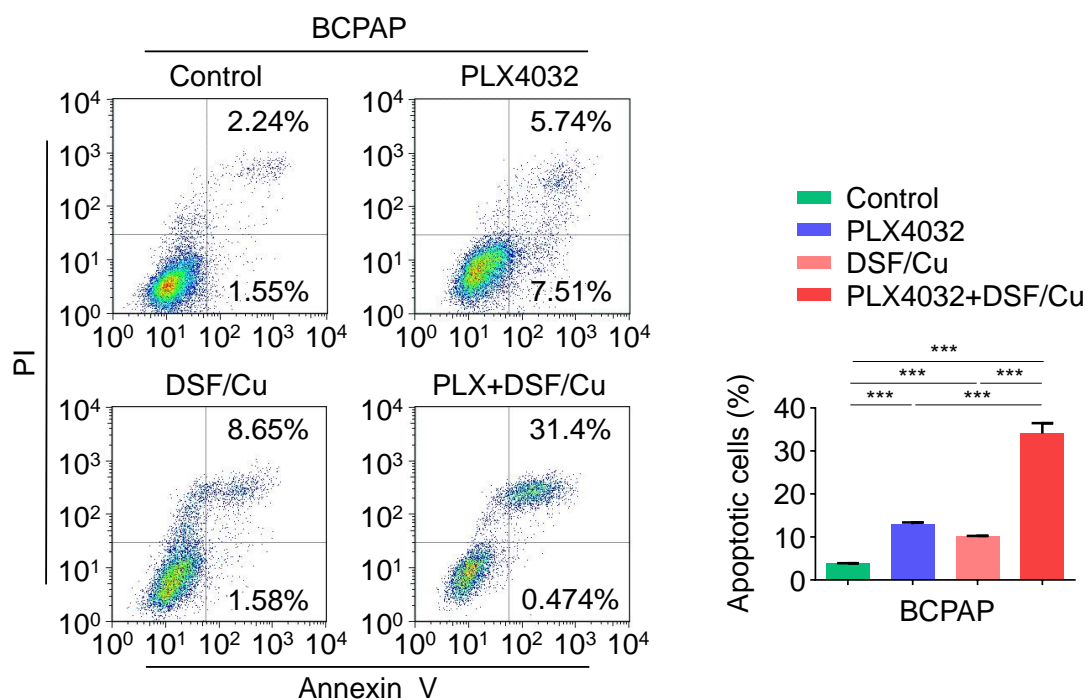

**Figure S2.** BCPAP cells were treated with DSF/Cu (500 nM: 500 nM ) and PLX4032 (2  $\mu$ M) , individually or in combination, for 48 h, and cell apoptosis was then measured by flow cytometry. Data presented as means  $\pm$  SD. \*\*\*  $P < 0.001$ .

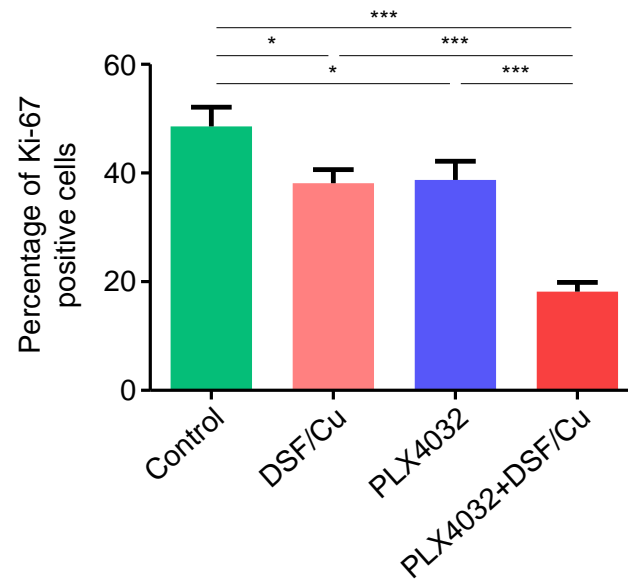

**Figure S3.** The percentage of Ki-67-positive cells was counted and compared among the indicated groups. Data presented as means  $\pm$  SD. \*  $P < 0.05$ ; \*\*\*  $P < 0.001$ .
